# Supplementary material for: Molecular Identification and Phylogenetic Analysis of Cymbidium Species (Orchidaceae) Based on the Potential DNA Barcodes matK, rbcL, psbA-trnH, and Internal Transcribed Spacer
Source: MDPI journal article supplement (doi:10.3390/agronomy14050933), 2024-04-29
Supplement: s1 [file s1]

**Table S2** GenBank accession numbers of the four loci sequences for *Cymbidium* species examined in this study.

| Voucher No. | ITS      | <i>matK</i> | <i>psbA-trnH</i> | <i>rbcL</i> |
|-------------|----------|-------------|------------------|-------------|
| C-HZ001     | KJ597826 | KJ597860    | KJ597894         | KJ597928    |
| C-HZ002     | KJ597827 | KJ597861    | KJ597895         | KJ597929    |
| C-HZ003     | KJ597828 | KJ597862    | KJ597896         | KJ597930    |
| C-HZ004     | KJ597829 | KJ597863    | KJ597897         | KJ597931    |
| C-HZ005     | KJ597830 | KJ597864    | KJ597898         | KJ597932    |
| C-HZ006     | KJ597831 | KJ597865    | KJ597899         | KJ597933    |
| C-HZ007     | KJ597832 | KJ597866    | KJ597900         | KJ597934    |
| C-HZ008     | KJ597833 | KJ597867    | KJ597901         | KJ597935    |
| C-HZ009     | KJ597834 | KJ597868    | KJ597902         | KJ597936    |
| C-HZ010     | KJ597835 | KJ597869    | KJ597903         | KJ597937    |
| C-HZ011     | KJ597836 | KJ597870    | KJ597904         | KJ597938    |
| C-HZ012     | KJ597837 | KJ597871    | KJ597905         | KJ597939    |
| C-HZ013     | KJ597838 | KJ597872    | KJ597906         | KJ597940    |
| C-HZ014     | KJ597839 | KJ597873    | KJ597907         | KJ597941    |
| C-HZ015     | KJ597840 | KJ597874    | KJ597908         | KJ597942    |
| C-HZ016     | KJ597841 | KJ597875    | KJ597909         | KJ597943    |
| C-HZ017     | KJ597842 | KJ597876    | KJ597910         | KJ597944    |
| C-HZ018     | KJ597843 | KJ597877    | KJ597911         | KJ597945    |
| C-HZ019     | KJ597844 | KJ597878    | KJ597912         | KJ597946    |
| C-HZ020     | KJ597845 | KJ597879    | KJ597913         | KJ597947    |
| C-HZ021     | KJ597846 | KJ597880    | KJ597914         | KJ597948    |
| C-HZ022     | KJ597847 | KJ597881    | KJ597915         | KJ597949    |
| C-HZ023     | KJ597848 | KJ597882    | KJ597916         | KJ597950    |
| C-HZ024     | KJ597849 | KJ597883    | KJ597917         | KJ597951    |
| C-HZ025     | KJ597850 | KJ597884    | KJ597918         | KJ597952    |
| C-HZ026     | KJ597851 | KJ597885    | KJ597919         | KJ597953    |
| C-HZ027     | KJ597852 | KJ597886    | KJ597920         | KJ597954    |
| C-HZ028     | KJ597853 | KJ597887    | KJ597921         | KJ597955    |
| C-HZ029     | KJ597854 | KJ597888    | KJ597922         | KJ597956    |
| C-HZ030     | KJ597855 | KJ597889    | KJ597923         | KJ597957    |
| C-HZ031     | KJ597856 | KJ597890    | KJ597924         | KJ597958    |
| C-HZ032     | KJ597857 | KJ597891    | KJ597925         | KJ597959    |
| C-HZ033     | KJ597858 | KJ597892    | KJ597926         | KJ597960    |
| C-HZ034     | KJ597859 | KJ597893    | KJ597927         | KJ597961    |
