# Supplementary material for: Molecular Identification and Phylogenetic Analysis of Cymbidium Species (Orchidaceae) Based on the Potential DNA Barcodes matK, rbcL, psbA-trnH, and Internal Transcribed Spacer
Source: MDPI journal article supplement (doi:10.3390/agronomy14050933), 2024-04-29
Supplement: s1 [file s1]

**Table S3** Accession numbers of the ITS sequences of *Cymbidium* species from GenBank

| Subgenus           | Section               | Species Name                                | GenBank Accession No.        |
|--------------------|-----------------------|---------------------------------------------|------------------------------|
| <i>Jensoa</i>      | <i>Jensoa</i>         | <i>C. ensifolium</i> (L.) Sw                | AF284716                     |
|                    |                       | <i>C. defoliatum</i> Y. S. Wu et S. C. Chen | AF284718                     |
|                    |                       | <i>C. cyperifolium</i> Wall. ex Lindl       | AF284719                     |
|                    |                       | <i>C. faberi</i> Rolfe                      | AF284721                     |
| <i>Cyperorchis</i> | <i>Geocymbidium</i>   | <i>C. lancifolium</i> Hook.                 | AF284724                     |
|                    | <i>Iridorchis</i>     | <i>C. wilsonii</i> (Rolfe ex Cook) Rolfe    | AF284705                     |
|                    |                       | <i>C. iridioides</i> D. Don                 | AF284702                     |
|                    |                       | <i>C. erythraeum</i> Lindl.                 | AF284703                     |
|                    |                       | <i>C. lowianum</i> Rchb.f.                  | AF284706                     |
|                    |                       | <i>C. insigne</i> Rolfe                     | AF284707                     |
|                    |                       | <i>C. wenshanense</i> Y. S. Wu et F. Y. Liu | AF284708                     |
|                    |                       | <i>C. tracyanum</i>                         | AF284701                     |
|                    | <i>Eburnea</i>        | <i>C. eburneum</i> Lindl.                   | JF729012; AF284709           |
|                    | <i>Cyperorchis</i>    | <i>C. elegans</i> Lindl.                    | JF729009                     |
|                    | <i>Parishiella</i>    | <i>C. tigrinum</i> Parish ex Hook           | JF729008; AF284713           |
| <i>Cymbidium</i>   | <i>Cymbidium</i>      | <i>C. aloifolium</i> (L.) Sw.               | AF284695; JN114485; JF729014 |
|                    |                       | <i>C. bicolor</i> Lindl.                    | AF284696                     |
|                    | <i>Himentophyllum</i> | <i>C. dayanum</i> Rchb. f.                  | AF284697                     |
|                    | <i>Floribunda</i>     | <i>C. floribundum</i> Lindl.                | AF284698                     |
|                    |                       | <i>C. suavissimum</i> Sander ex C. Curtis   | AF284700                     |
